# Supplementary material
Source: Research Square preprint supplement (doi:10.21203/rs.3.rs-9053458/v1)
Supplement: Supplementary file 1 [file ac2f6acc72067f3980752569.docx]

**Tables**

Table 1. Descriptive statistics of inlet air conditions and incident solar radiation during the experimental period (June 1–30, 2025)

| Environmental Parameter | Mean | Std. Deviation | Minimum | Maximum |
| --- | --- | --- | --- | --- |
| Inlet Air Temperature () | 29.7 | 5.1 | 16.0 | 35.3 |
| Inlet Air Relative Humidity (%) | 15.0 | 5.5 | 10.4 | 30.6 |
| Inlet Air Thermal Content (kJ/kg) | 42.8 | 5.4 | 27.8 | 49.1 |
| Inlet Air Moisture Content (g/kg) | 5.1 | 0.4 | 4.3 | 5.9 |
| Incident Solar Radiation (W/m2) | 511.0 | 286.1 | 0.0 | 863.2 |

**Note**: n=145 readings.

Table 2. Correlation analysis and effect sizes of galvanized steel tubular solar heater length and airflow velocity on the thermal and moisture characteristics of drying air

| Dependent Variable | Heater Length (m) | | Airflow Velocity (m/s) | | Effect Size of the Interaction Between Heater Length and Airflow Velocity (%) |
| --- | --- | --- | --- | --- | --- |
| Correlation (%) | Effect size (%) | Correlation (%) | Effect size (%) |
| Percentage Increase in Drying Air Temperature (ΔT, %) | 51** | 47* | -23** | 10* | 3* |
| Percentage Decrease in Drying Air Relative Humidity (%) | 56** | 50* | 44** | 34* | 16* |
| Thermal Content of Drying Air (h, kJ/kg) | 45** | 59* | 6 | 1* | 19* |
| Moisture Content of Drying Air (g/kg) | 2 | 35* | 24** | 15* | 45* |
| Moisture Carrying Capacity of Drying Air (g/kg) | 55** | 57* | -30** | 19* | 5* |

**Note:** ** and * indicate that the correlation coefficient and effect-size ratio are significant at *p* ≤ 0.01 and *p* ≤ 0.05, respectively (n = 97). Effect size values are interpreted as follows: trivial for values <10%, small for values 10–30%, medium for values 30–50%, and large for values >50%.

Table 3. Effect of galvanized steel tubular solar heater length and airflow velocity on the thermal and moisture characteristics of drying air

| Independent Variable | Thermal and Moisture Characteristics of Drying Air | | | | | |
| --- | --- | --- | --- | --- | --- | --- |
|  |  |  |  |  | |
| Heater Length (m) | | | | | | |
| L6 m (3 Tubes) | 18.7 ±8.5c | 40.7 ±8.1c | 50.7 ±3.0c | 4.9 ±0.7b | | 54.1 ±9.3c |
| L12 m (6 Tubes) | 38.7 ±8.5a | 51.6 ±6.5b | 59.2 ±2.6a | 5.7 ±0.6a | | 80.0 ±11.5a |
| L18 m (9 Tubes) | 35.2 ±12.1b | 53.3 ±7.4a | 56.1 ±4.1b | 5.0 ±0.7b | | 75.2 ±12.1b |
| Airflow Velocity (m/s) | | | | | | |
| V1 m/s | 34.6 ±13.2a | 43.5 ±8.81c | 55.8 ±5.3a | 4.9 ±0.7b | | 75.5 ±16.4a |
| V2 m/s | 30.9 ±12.3b | 48.7 ±9.4b | 55.1 ±4.3a | 5.3 ±0.9a | | 69.7 ±14.9b |
| V3 m/s | 27.2 ±13.0c | 53.5 ±6.5a | 55.1 ±4.8a | 5.4 ±0.7a | | 64.1 ±13.8c |

**Note**: Values are expressed as the mean ± standard deviation. Means within the same column following by different letters are significantly different at p ≤ 0.05 (n = 291). **Abbreviations**: ΔT, percentage increase in drying air temperature; Δϕ, percentage decrease in drying air relative humidity; h, thermal content of drying air; ω, moisture content of drying air; Δω, moisture carrying capacity of drying air.

Table 4. Effect of experimental treatments (heater length vs. airflow velocity) on the thermal and moisture characteristics of drying air

| Heater Length | Airflow Velocity |  |  |  |  |  |
| --- | --- | --- | --- | --- | --- | --- |
| L6 m (3 Tubes) | V1 m/s | 21.5 ±6.2c | 35.6 ±5.1g | 49.8 ±3.3f | 4.2 ±0.4f | 58.5 ±10.2c |
| V2 m/s | 20.4 ±8.9c | 37.4 ±4.7f | 52.0 ±3.2e | 5.2 ±0.5d | 55.5 ±7.9d |
| V3 m/s | 14.2 ±8.2d | 49.2 ±6.5d | 50.3 ±1.8f | 5.4 ±0.7c | 48.4 ±6.3e |
| L12 m (6 Tubes) | V1 m/s | 41.3 ±8.9a | 45.8 ±5.8e | 58.5 ±2.3b | 5.1 ±0.4d | 84.4 ±9.5a |
| V2 m/s | 40.0 ±6.7a | 51.9 ±3.3c | 59.7 ±2.4a | 6.4 ±0.2a | 82.6 ±12.7a |
| V3 m/s | 34.9 ±8.3b | 57.1 ±4.4a | 59.5 ±3.0a | 5.6 ±0.5b | 73.1 ±8.5b |
| L18 m (9 Tubes) | V1 m/s | 40.9 ±12.3a | 49.2 ±8.5d | 59.0 ±3.7ab | 5.4 ±0.5c | 83.8 ±13.4a |
| V2 m/s | 32.4 ±11.6b | 56.7 ±5.3a | 53.5 ±2.4d | 4.3 ±0.4e | 71.1 ±8.4b |
| V3 m/s | 32.5 ±10.6b | 54.1 ±5.9b | 55.6 ±3.9c | 5.1 ±0.7d | 70.9 ±9.1b |

**Note**: Values are expressed as the mean ± standard deviation. Means within the same column following by different letters are significantly different at p ≤ 0.05 (n = 97). **Abbreviations**: ΔT, percentage increase in drying air temperature; Δϕ (%), percentage decrease in drying air relative humidity; h, thermal content of drying air; ω, moisture content of drying air; Δω, moisture carrying capacity of drying air.
